# Supplementary material for: Sensitivity of the EQ-5D-5L for fatigue and cognitive problems and their added value in Q-fever patients
Source: Springer Nature journal article supplement (doi:10.1007/s11136-021-03069-9), 2022-01-29
Supplement: MOESM1 [file 20078438]

## Supplementary Information

*Sensitivity of the EQ-5D-5L for fatigue and cognitive problems and their added value in Q-fever patients*

*Quality of Life Research*

*A.J.L.M. Geraerds, Suzanne Polinder, Inge Spronk, Alfons G.M. Olde Loohuis, Annemieke de Groot, Madelon B. Bronner, Juanita A. Haagsma*

*Erasmus MC, University Medical Center Rotterdam, Department of Public Health, The Netherlands.*

[a.geraerds@erasmusmc.nl](mailto:a.geraerds@erasmusmc.nl)

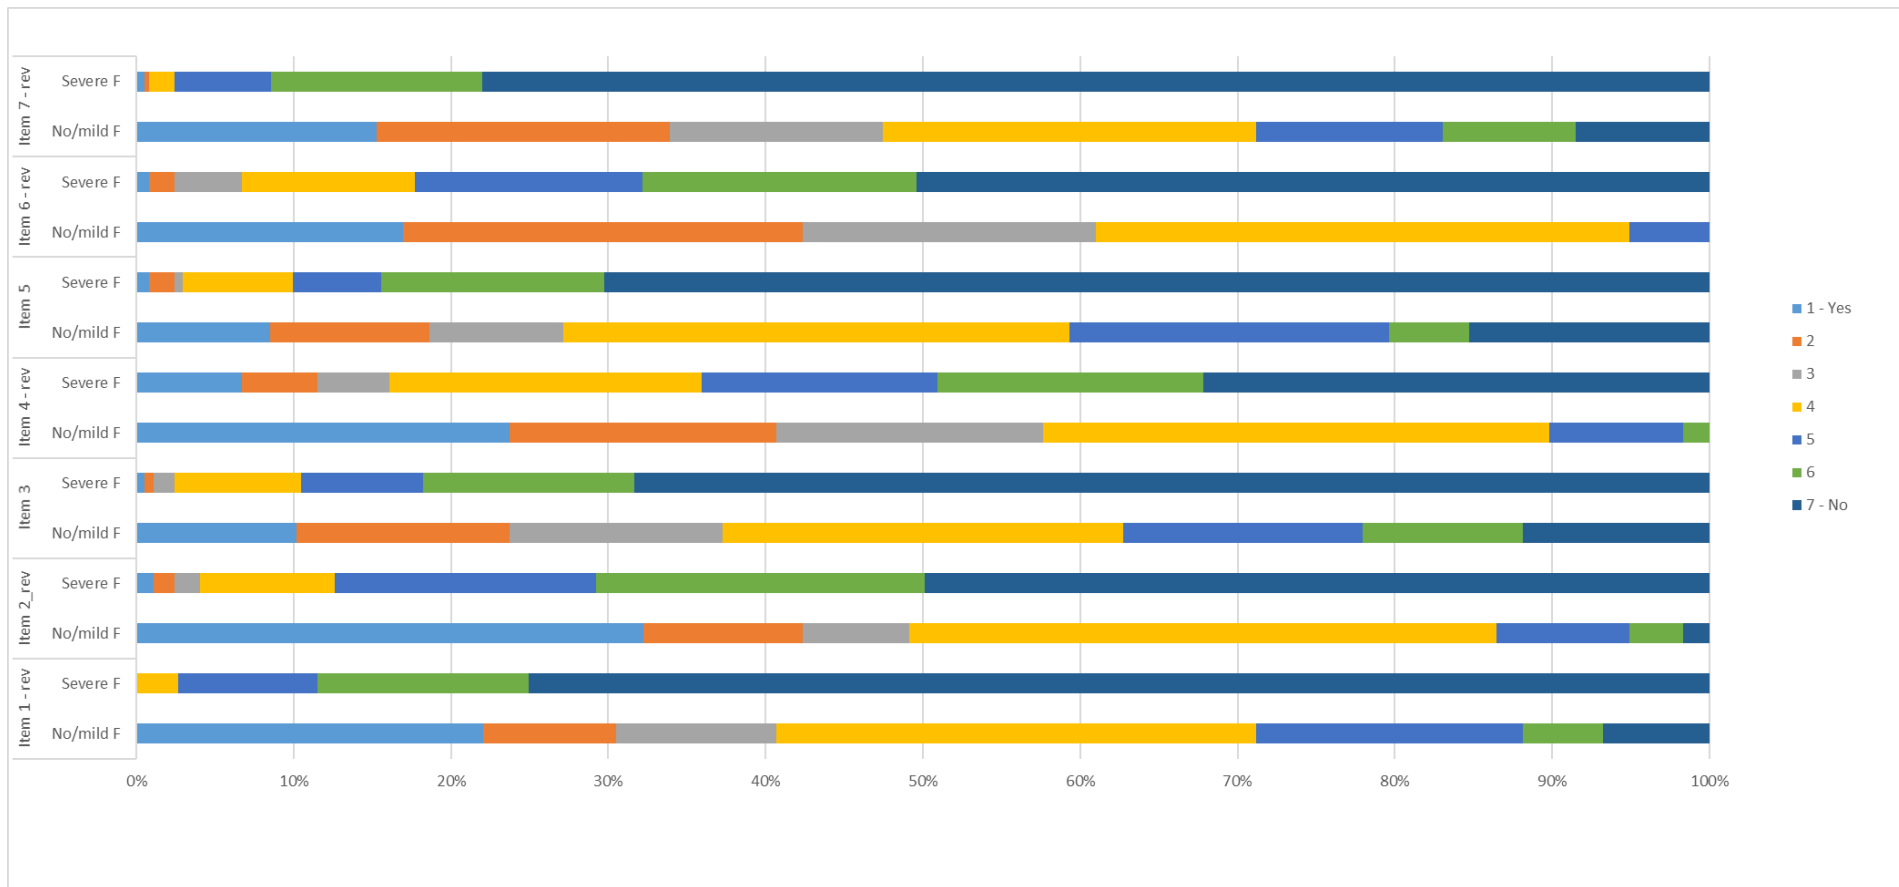

Figure A1: Distribution of responses on the CIS fatigue items per fatigue item for patients reporting no/mild fatigue and severe fatigue

NOTE1: Items with 'rev' were presented with reversed scoring, meaning that for all items a score of 7 represents fatigue, and a score of 1 represents no fatigue

NOTE2: Item 1: I feel tired; Item 2: Physically I feel exhausted; Item 3: I feel fit; Item 4: I feel weak; Item 5: I feel rested; Item 6: Physically I feel I am in a bad condition; Item 7: I get tired very quickly; Item 8: Physically I feel in a good shape

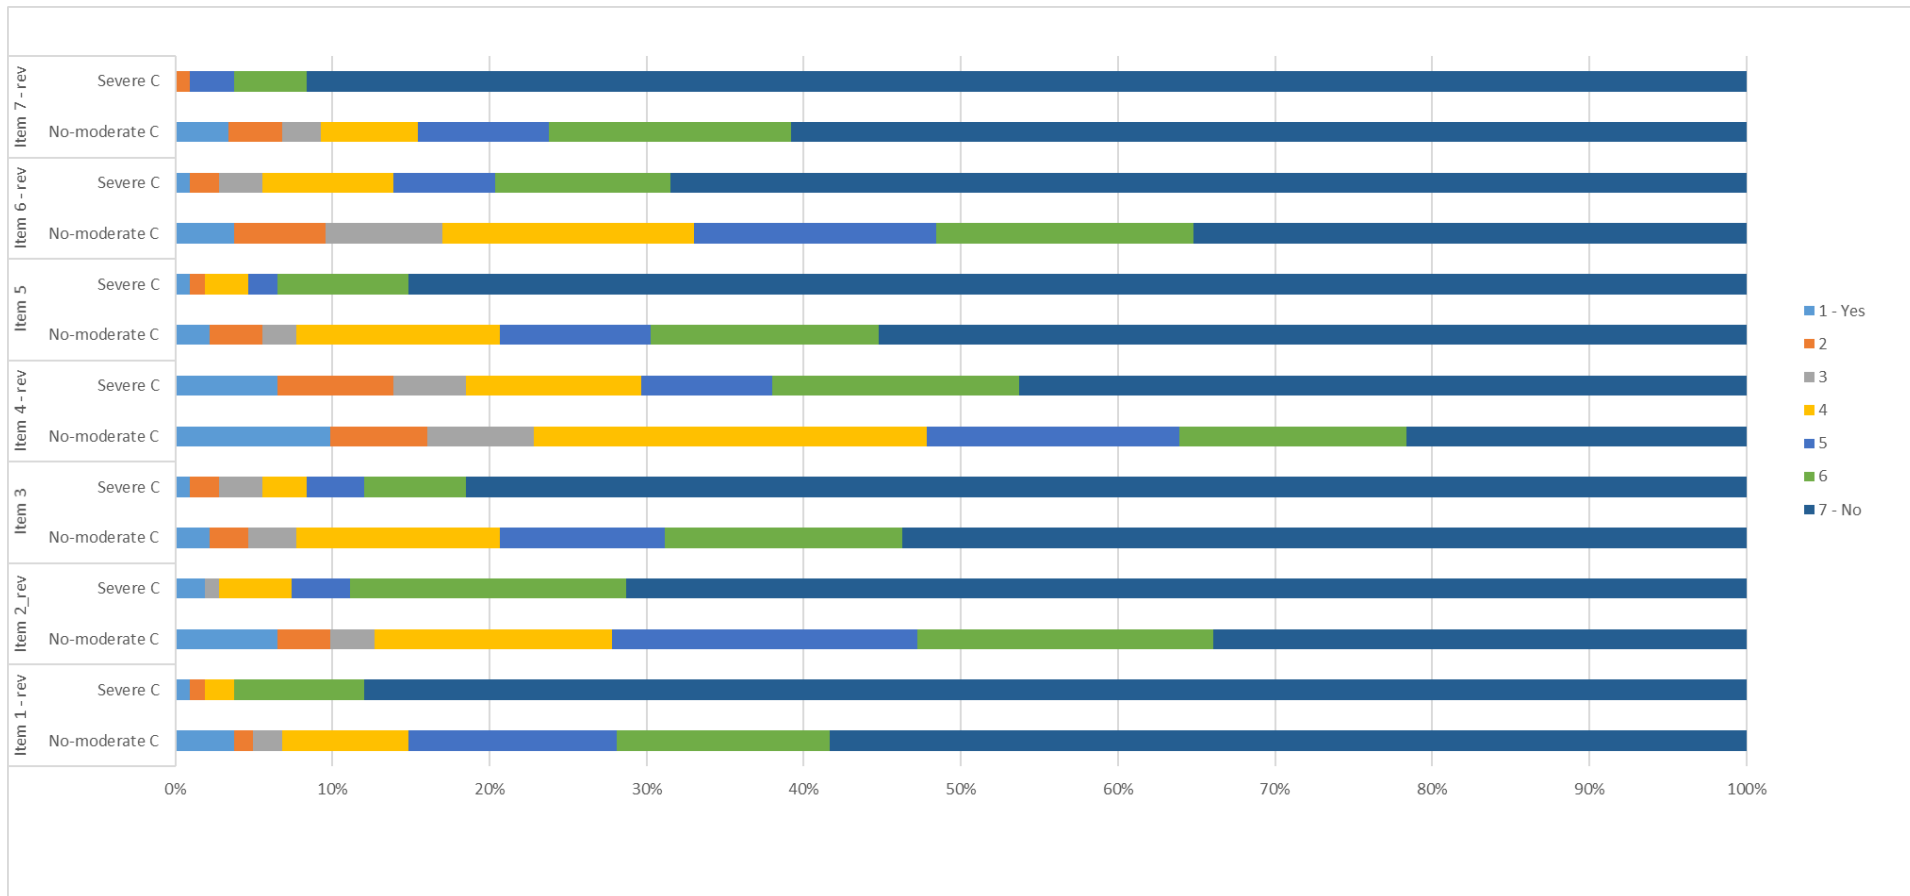

Figure A2: Distribution of responses on the CIS fatigue items per fatigue item for patients reporting no-moderate cognitive problems and severe cognitive problems

NOTE: Items with 'rev' were presented with reversed scoring, meaning that for all items a score of 7 represents fatigue, and a score of 1 represents no fatigue
